# Supplementary material for: Clinical outcomes and risk factors of secondary extraintestinal manifestation in ulcerative colitis: results of a multicenter and long-term follow-up retrospective study
Source: PeerJ. 2019 Jun 21;7:e7194. doi: 10.7717/peerj.7194 (PMC6609875; doi:10.7717/peerj.7194)
Supplement: Supplemental Information 1 — The clinical and basic characteristics of the whole cohort (271 patients). All data was collected from electronic medical records and follow-up. All statistical analysis is performed on this data. [file peerj-07-7194-s001.xlsx]

## Sheet: ALL data
Hospital number	Sex（1=male，2=female）	Age at diagnosis	Follow-up period	Disease duration	Relapse(0=First occurrence ,1=First recurrence,2=Multiple recurrence)	Stool with mucous	Bloody stool (0=No, 1= Yes)	Abdominal bloating and distension (0=No, 1= Yes)	Diarrhea (0=No, 1= Yes)	Stool frequency（1=1-2 times/day,2=3-4 times/day,3=4-5 times/day,4= more than 6 times/day)	Weight loss (0=No, 1= Yes)	Extraintestinal manifestations (0=No, 1= Yes)	History of surgery (0=No, 1= Yes)	Family history,（0=No，1=CRC and IBD，2= other cancers）	Hemoglobin	Albumin	Extent of UC（1=E1，2=E2，3=E3）	Clinical outcomes（1=Cure，2=Remission，3=Alternate or continuous disease activity，4=Serious complications，5=Surgery，6=Death,7=CRC and high-grade dysplasia）	Steroids（0=No，1=Yes）	Immunomodulators（0=No，1=Yes）	Malignant transformation（0=No，1=High-grade dysplaisa，2=CRC）
516182	2	36	19	11	2	1	1	0	1	4	1	0	0	0	94	36	3	2	1	0	0
518487	1	17	18	10	0	1	1	0	1	2	0	0	0	0	142	36	2	1	0	0	0
519118	2	52	18	10	2	1	1	1	1	2	0	0	0	0	109	36	2	3	1	0	0
519737	1	19	19	10	2	0	1	0	1	3	1	0	0	0	112	36	2	1	1	0	0
519764	2	53	18	10	2	1	1	1	1	4	0	0	0	0	132	22	2	2	0	0	0
521099	2	33	23	15	2	0	1	0	1	2	1	0	0	0	75	36	2	3	1	0	0
521890	1	48	18	10	2	0	0	1	1	3	1	0	0	0	123	36	3	2	1	1	0
522570	2	36	18	10	2	1	1	0	1	4	0	0	0	0	102	36	3	3	0	0	0
525959	1	51	18	10	0	1	1	0	1	5	1	1	0	0	150	36	3	3	1	0	0
529606	2	27	19	11	2	0	1	0	1	1	0	0	0	2	134	10	2	1	1	0	0
530523	1	49	18	10	0	0	0	0	1	4	1	0	0	0	124	11	3	2	0	0	0
532814	1	70	18	10	2	1	1	0	0	4	1	0	0	0	77	81	2	2+4	1	0	0
534037	2	39	26	10	2	1	1	0	1	4	0	0	0	0	128	33	2	2	1	0	0
538652	1	48	18	10	0	0	0	0	0	1	1	0	0	0	141	43	1	2+7	0	0	1
544956	1	15	17	9	0	1	1	0	1	3	1	1	0	0	78	10	3	1+4	1	0	0
552681	1	44	17	9	0	0	1	0	1	4	0	0	0	0	168	18	2	2	0	0	0
554850	2	43	17	9	2	1	1	0	1	4	1	1	0	0	147	13	2	2	1	0	0
555614	2	43	17	9	2	1	1	0	1	4	1	1	0	2	109	10	2	3	1	0	0
559203	2	48	17	9	2	1	1	1	1	4	0	0	1	0	119	46	2	2	0	0	0
560223	2	19	17	9	0	1	1	0	1	4	1	0	0	0	85	65	3	2+4	0	0	0
561794	1	73	17	9	2	0	1	0	0	1	0	0	0	0	89	104	1	3	0	0	0
44043700	2	41	22	14	2	0	1	1	1	3	0	0	0	0	131	14	2	2	1	0	0
44058700	2	39	22	14	0	0	1	0	1	4	1	0	1	0	86	18	2	2	1	0	0
44678000	1	63	21	13	2	0	1	1	1	5	0	1	1	0	160	20	2	3	1	0	0
44710600	1	26	24	16	2	1	1	0	1	3	1	0	0	0	110	12	3	3	1	0	0
44762700	2	67	22	14	2	1	1	0	1	4	0	0	1	0	118	11	2	3	0	0	0
45160000	1	39	28	20	2	1	1	1	1	3	0	0	0	0	145	22	3	3	1	0	0
45652500	1	52	19	11	2	1	1	0	1	3	1	0	0	0	127	10	2	2	0	0	0
46123000	2	59	21	13	0	1	1	0	1	5	0	1	1	0	84	16	2	3+4	1	0	0
46439900	1	30	31	23	2	1	1	0	1	2	0	1	0	0	102	10	3	3	1	0	0
46826800	1	49	21	13	2	1	1	0	1	3	0	0	0	0	122	15	2	1	1	0	0
47095200	1	42	21	13	0	0	1	0	1	3	0	0	0	0	126	19	2	2	1	0	0
47277400	2	27	21	13	0	1	1	0	1	1	0	0	0	0	114	13	3	2	0	0	0
48182400	1	48	20	12	0	1	1	0	1	1	0	0	0	0	124	15	2	2	0	0	0
48486400	1	72	20	12	0	1	1	0	0	2	1	0	0	0	141	21	2	2	1	0	0
49150200	1	45	20	12	2	1	1	1	1	4	1	0	0	0	126	35	3	3	1	1	0
49426900	2	19	20	12	0	0	1	0	0	1	0	0	0	0	129	10	3	2	0	0	0
50475100	2	68	19	11	2	1	1	0	0	4	1	1	0	0	116	13	3	2	1	0	0
511777	2	33	22	14	2	0	1	0	0	2	1	0	1	0	110	10	2	3	1	0	0
51467800	2	75	23	25	2	0	1	0	1	3	1	0	0	0	48	14	2	3+4	0	0	0
523432	1	46	18	10	0	1	1	0	0	0	0	0	0	0	142	35	2	1+7	0	0	1
z000019	2	48	46	38	2	0	0	0	1	4	0	0	0	0	127	19	2	5+7	0	0	2
z003581	1	18	18	4	0	0	1	0	1	3	1	0	0	0	5.7	33	3	2+4	1	0	0
z009359	1	47	16	8	0	1	1	1	1	4	1	0	0	0	91	13	2	1	1	0	0
z010946	1	19	16	8	2	1	1	0	0	1	0	0	0	0	145	19	2	1	1	0	0
z016016	1	16	16	8	2	1	1	0	1	0	1	0	0	0	66	14	2	5+4	1	1	0
z016844	1	73	17	9	2	1	1	0	1	3	0	0	0	0	100	13	3	3+5	1	0	0
z019903	1	49	16	8	2	0	1	0	1	2	1	0	0	0	144	13	2	3	1	0	0
z021262	1	29	32	24	2	1	1	1	1	4	0	0	0	0	131	22	2	3	1	1	0
z022147	2	26	20	12	2	1	1	0	0	4	0	0	0	0	122	12	3	2	1	0	0
z024375	2	17	16	8	0	1	1	0	1	3	1	0	0	0	112	79	3	2	1	0	0
z029516	1	55	16	8	0	0	1	0	1	2	0	0	0	0	143	25	2	1	0	0	0
z030967	1	23	16	8	2	1	1	0	1	3	1	0	0	0	56	7	2	1	1	0	0
z032608	1	35	16	8	2	0	1	0	0	1	0	0	0	0	97	21	2	5＋6+7+4	1	0	2
z033366	2	46	15	12	2	0	0	1	1	2	0	0	0	0	108	9	2	3	0	0	0
z034029	2	19	15	7	2	0	1	0	1	2	1	0	0	0	54	8	3	1+4	1	0	0
z036238	2	47	15	7	0	0	1	0	0	3	0	0	0	0	119	194	2	2	0	0	0
z039169	1	58	15	7	0	0	1	0	1	3	1	0	0	0	132	32	2	3	1	0	0
z040414	2	40	15	7	0	1	1	0	0	1	0	0	0	0	119	12	2	1	0	0	0
z040579	2	44	15	7	2	0	1	0	1	4	0	0	0	1	130	13	2	3+7	1	0	1
z040583	1	29	15	7	0	0	1	0	1	2	0	0	0	0	135	22	2	3+4	1	0	0
z041933	1	35	23	15	2	0	1	0	1	2	1	1	0	0	115	17	2	3	1	0	0
z042656	2	68	15	7	0	0	0	1	1	3	0	1	0	0	83	14	2	5＋6+4	0	0	0
z043625	1	73	15	7	2	1	0	1	1	4	1	0	0	0	105	70	2	3+4	1	0	0
z043859	1	50	17	9	2	1	1	0	1	4	0	0	0	0	100	49	2	3	1	0	0
z045330	2	57	15	7	0	1	1	0	1	4	1	0	0	2	104	13	2	2	1	0	0
z045387	1	70	15	7	0	1	0	0	0	1	0	0	0	0	78	12	2	5+4	0	0	0
z046635	2	53	15	7	2	1	1	0	1	3	1	1	0	0	87	51	3	1	1	0	0
z048508	2	24	16	8	2	1	1	0	1	4	0	0	0	0	113	9	3	2	1	0	0
z048695	1	18	15	7	2	0	1	0	1	4	1	0	0	0	82	15	3	5+4	1	1	0
z049773	2	55	16	8	1	1	0	1	1	2	1	1	0	0	122	28	3	3	1	0	0
z051299	2	20	18	10	2	1	1	0	1	4	0	0	0	0	131	7	2	3+4	1	1	0
z055503	1	71	12	4	0	1	1	0	1	4	1	0	0	0	146	16	2	1	0	0	0
z055828	1	41	15	7	0	0	0	0	0	2	0	0	0	0	124	17	2	2	0	0	0
z059214	2	56	20	12	2	1	1	0	1	3	0	0	0	0	135	13	3	3	1	0	0
z061239	1	55	15	7	2	0	1	0	1	4	1	0	0	0	126	63	3	3+5+6+4	1	0	0
z063682	1	30	14	6	0	1	1	0	1	4	1	0	0	0	132	89	2	2+4	1	0	0
z065642	1	29	27	19	2	1	1	0	1	4	1	0	0	0	181	29	3	3	1	0	0
z066447	2	42	16	8	2	1	1	0	1	4	0	0	0	0	128	10	2	3	1	0	0
z066894	2	51	14	6	2	1	1	0	1	4	0	0	0	0	77	10	3	3	1	0	0
z067081	2	56	14	6	2	0	1	0	0	2	0	0	1	0	141	14	2	1	1	0	0
z067284	1	55	16	8	2	0	0	0	0	1	0	0	0	0	136	49	3	5＋6+4	1	1	0
z069589	2	39	22	14	2	0	1	0	0	1	0	0	0	0	87	17	2	3	1	0	0
z070708	2	28	19	11	2	0	1	0	1	4	0	0	0	0	132	70	2	5＋6+4	1	1	0
z073091	1	70	16	8	2	0	1	0	1	4	0	0	0	0	117	15	2	2	1	0	0
z073421	2	50	20	12	2	1	0	1	1	3	0	0	0	2	100	11	2	3	1	0	0
z073726	2	71	14	6	0	0	1	0	1	3	1	0	0	0	105	39	3	2	1	0	0
z074100	2	14	14	6	0	1	1	0	1	2	0	0	0	0	95	12	2	2	0	0	0
z074565	1	31	14	6	0	0	1	0	1	4	0	0	0	0	116	13	3	2+4	1	0	0
z075088	1	26	19	11	2	0	1	1	0	3	1	0	0	2	148	13	1	3	1	0	0
z082997	1	60	14	6	2	1	1	0	1	1	0	0	0	0	107	31	2	1	1	0	0
z085679	2	21	13	6	0	1	1	0	1	4	0	0	0	0	111	6	3	2	0	0	0
z086438	2	16	16	8	2	1	1	1	1	3	0	0	0	0	121	12	2	2	1	0	0
z087636	1	35	26	18	2	1	1	0	0	3	0	0	0	0	145	12	2	3+5+7	0	0	1
z087770	1	49	13	5	2	1	1	0	1	4	0	0	0	0	130	29	2	2	0	0	0
z087892	2	43	13	5	0	1	1	0	1	4	0	0	0	0	126	14	2	2	0	0	0
z088563	1	49	13	5	2	0	1	0	1	5	0	1	0	0	82	12	2	3	0	0	0
z088898	1	71	13	4	0	0	1	0	0	2	0	1	0	0	130	10	2	1	0	0	0
z089173	2	75	14	6	2	0	1	0	0	1	0	0	0	0	113	12	2	3	0	0	0
z091996	2	43	15	7	2	1	1	0	0	1	0	0	0	2	132	13	2	3	0	0	0
z094086	1	41	13	4	2	1	1	0	0	1	0	0	0	0	54	23	2	3	1	0	0
z094144	1	20	13	5	0	1	1	0	1	2	1	0	0	0	139	13	2	2+5+4	1	0	0
z095554	2	47	13	5	2	1	0	0	1	3	0	1	0	0	130	9	2	2	0	0	0
z098279	1	32	23	15	2	1	1	1	1	3	1	0	0	0	44	9	2	5＋6+7+4	1	1	2
z098712	1	32	20	12	2	0	1	0	1	4	0	0	0	0	117	10	3	1	0	0	0
z099187	1	31	13	5	0	1	1	0	1	1	0	0	0	0	152	14	1	2	0	0	0
z100965	2	64	13	5	0	1	0	0	0	1	0	0	0	0	133	22	2	1	0	0	0
z102164	1	45	13	5	0	1	0	0	1	3	0	0	0	0	128	11	2	2	1	0	0
z102707	1	21	14	6	2	0	0	0	0	1	1	0	0	0	103	10	3	2+4	1	0	0
z103213	2	48	12	5	2	0	1	1	0	3	0	0	0	0	115	17	2	2	1	1	0
z103909	2	56	13	5	0	1	0	1	1	2	1	0	0	0	113	43	2	2	0	0	0
z104377	1	77	12	2	2	0	1	0	0	2	0	0	1	0	134	10	2	3	1	0	0
z107125	1	32	13	5	2	1	1	0	1	3	0	1	0	0	145	29	2	2	1	0	0
z107939	2	35	13	5	0	0	1	0	1	4	0	0	0	2	80	12	3	5+4	1	0	0
z108454	1	49	15	7	2	1	1	0	1	4	1	1	0	0	121	30	2	5	1	0	0
z108652	1	27	13	5	1	1	0	0	1	4	1	0	0	0	158	16	2	2	1	0	0
z111740	1	51	13	5	2	0	1	0	1	4	1	0	0	2	79	17	3	5+4	1	1	0
z111743/z190106	2	35	17	9	2	0	1	0	1	3	1	0	0	0	105	23	2	3	1	0	0
z111994	2	37	19	11	2	0	1	0	0	4	0	0	0	0	122	17	2	1	1	0	0
z112204	2	44	15	7	2	0	1	1	0	1	1	0	0	0	108	10	1	3	1	0	0
z112900	1	65	13	5	2	0	0	0	1	4	1	0	0	0	133	23	3	3+5+7	0	0	1
z113684	2	45	13	5	2	0	1	0	1	3	0	0	0	1+2	114	12	2	1	1	0	0
z115627	2	31	19	10	2	1	1	0	1	4	0	0	0	0	107	13	3	3	1	0	0
z122931	1	57	13	2	2	1	1	0	1	3	0	0	0	0	114	15	3	2	0	0	0
z124413	1	20	17	9	2	0	1	0	1	2	1	0	0	0	131	17	3	2	1	1	0
z124964	2	55	12	1	2	0	0	1	1	3	1	1	0	0	77	19	2	5	0	0	0
z127816	2	52	12	4	2	0	1	0	1	2	1	0	0	0	124	10	2	2	0	0	0
z128387	2	41	27	19	2	1	1	0	0	2	0	0	0	0	138	12	2	3	0	0	0
z135624	1	54	12	4	2	1	1	0	1	4	1	0	0	0	131	13	2	1	1	1	0
z137726	1	23	22	14	2	0	1	0	0	1	0	0	0	0	140	64	3	3	1	0	0
z138861	1	38	12	4	0	1	1	0	1	1	0	0	0	0	136	34	3	2	0	0	0
z139511	1	28	12	4	0	1	1	1	1	2	1	0	0	0	133	28	2	2	1	1	0
z140226	1	32	14	6	2	0	1	0	1	4	1	0	0	0	137	36	2	3	1	0	0
z142720	2	67	12	4	0	0	0	0	1	3	1	1	0	0	71	36	2	6	0	0	0
z143237	1	54	12	4	0	1	1	0	1	4	0	0	0	0	110	36	2	2	1	1	0
z143683	2	17	12	22	2	1	1	1	0	2	0	0	0	0	145	36	2	3	0	0	0
z144684	2	36	12	4	2	0	1	0	1	4	1	0	1	0	87	10	3	3	0	0	0
z147230	2	51	12	4	2	0	1	0	1	4	1	0	0	0	109	215	2	2	0	0	0
z147437	1	28	13	5	2	1	1	0	0	3	1	0	0	0	104	36	2	2	1	0	0
z150433	1	31	12	4	0	1	1	0	0	3	0	0	0	0	158	10	2	2	0	0	0
z152474	2	41	15	7	2	1	1	0	1	3	0	0	0	2	119	20	2	3	1	0	0
z152820	2	75	12	4	0	1	1	0	1	3	0	0	0	0	139	16	3	7	1	0	2
z153446	2	51	12	4	0	0	0	1	1	2	0	0	0	0	115	14	2	1	1	0	0
z159967	1	22	11	3	2	1	1	0	1	3	1	0	0	0	63	10	2	3	1	0	0
z161993	1	66	11	3	1	0	1	1	0	1	0	0	0	0	146	15	2	2	1	0	0
z162951	2	26	37	28	0	0	1	0	1	3	1	0	0	0	59	10	3	2+4	1	0	0
z167707	1	33	13	5	2	1	1	1	1	1	1	0	0	0	105	17	2	2	1	0	0
z170707	1	49	11	3	2	1	0	0	1	4	1	0	0	0	110	38	2	1	0	0	0
z171923	2	13	11	3	2	1	1	0	1	4	0	0	0	0	52	8	2	2+4	1	0	0
z172867	2	28	11	3	0	1	1	0	1	2	0	0	0	0	128	13	3	2	1	0	0
z174071	2	26	11	3	1	1	1	0	1	4	1	0	0	0	114	49	2	2	1	0	0
z174658	2	26	11	3	1	0	0	0	1	3	0	0	0	0	123	28	2	2	1	0	0
z176145	2	43	15	7	2	0	1	0	1	2	0	0	1	0	127	15	3	2	1	0	0
z176654	2	42	11	3	0	0	0	1	0	2	0	0	0	0	100	13	2	5+4	1	0	0
z177317	2	47	11	3	0	0	0	0	1	2	0	0	0	0	124	12	3	1	0	0	0
z177799	1	35	19	11	2	0	1	1	1	2	0	0	0	0	78	9	2	2+4	1	1	0
z180751	2	53	11	3	0	0	1	0	1	2	1	0	0	0	125	36	2	7	0	0	1
z181818	1	19	14	6	2	1	1	0	1	4	1	1	0	0	85	36	2	2	1	0	0
z181822	2	56	12	4	2	0	1	0	1	3	0	0	0	0	110	36	2	2+4	1	1	0
z183670	2	60	11	3	0	1	1	0	1	4	1	0	0	0	90	36	3	1+7+4	1	1	1
z160788	2	69	14	6	2	0	1	0	0	2	0	0	0	0	116	10	2	3	0	0	0
z188319	2	53	11	3	0	0	1	0	1	6	1	0	0	0	47	10	2	2+4	1	0	0
z180512	1	65	17	9	2	0	1	1	1	2	1	0	0	0	121	29	2	5+6+7	0	0	2
z022257	2	39	17	9	1	1	1	0	0	3	0	0	0	0	78	19	2	3+4	1	0	0
z120547	1	32	14	6	2	0	0	0	0	1	1	0	1	0	152	26	2	5+4	0	0	0
z116814	2	22	12	6	1	0	1	0	0	2	0	0	1	0	104	14	3	3+4	0	0	0
z11682	1	56	19	3	1	1	1	0	1	4	1	0	1	0	128	11	3	2	1	0	0
506113	1	35	11	3	2	1	1	0	0	1	1	0	0	0	119	14	2	3	0	0	0
z004539	1	38	11	3	2	0	1	1	0	4	0	0	0	0	122	24	2	4+5	0	0	0
z214919	1		10	2	0	1	0	1	0	1	1	0	0	0	132	25	2	1	1	0	0
z215387	1	53	13	5	2	1	1	0	0	2	0	0	0	0	147	10	2	3	0	0	0
z206187	1	45	19	11	2	0	1	1	1	4	0	1	0	0	131	26	3	3	1	0	0
z207731	1	21	13	5	2	1	1	1	0	3	0	0	0	0	130	19	2	3	0	0	0
z207013	2	27	12	4	2	0	0	1	0	1	0	0	0	0	96	11	3	5+4	0	0	0
z196314	1	48	18	10	2	0	1	0	1	4	0	0	0	0	112	16	2	2	1	0	0
z200964	1	20	12	4	2	0	1	0	0	2	0	0	0	0	156	77	2	3	0	0	0
z243391	2	23	15	7	2	1	1	0	1	4	1	1	0	0	92	12	2	3	1	0	0
z241555	1	36	16	8	2	1	1	0	1	4	0	0	0	0	75	23	3	3+4	1	1	0
z190693	1	40	14	6	2	1	1	0	1	4	1	0	0	0	126	10	2	3	0	0	0
z199319	1	57	12	4	2	0	1	0	0	1	0	0	0	0	129	32	2	2	0	0	0
z199364	1	25	11	3	2	1	1	0	1	4	0	0	0	0	113	13	3	3+4	1	0	0
z202924	1	52	10	2	2	0	1	0	1	4	1	0	0	2	130	9	3	2	1	0	0
z192287	1	55	13	5	2	1	1	1	1	2	0	0	0	0	140	33	2	3	1	1	0
z190787	2	33	15	7	2	1	1	0	0	2	1	0	0	0	106	9	2	3	1	0	0
z246099	1	56	11	3	2	0	1	1	1	3	0	0	0	0	122	18	3	2	0	0	0
z228600	2	41	11	3	2	0	0	0	1	3	0	0	0	0	125	18	1	2	0	0	0
z267660	2	57	9	1	0	0	1	0	0	1	0	0	0	0	122	81	2	5+4	0	0	0
z268922	1	18	10	2	1	0	1	0	0	2	0	0	0	0	81	10	3	2	0	0	0
z257337	1	41	21	13	2	1	1	0	1	4	0	0	0	1+2	122	21	2	3+7	0	0	1
z265843	2	32	9	1	0	1	1	0	1	2	1	0	0	0	142	19	2	2	0	0	0
z239460	2	15	10	2	2	1	1	0	1	1	0	0	0	0	127	23	2	2	1	0	0
z264390	2	52	10	2	2	0	1	0	1	2	0	0	0	0	113	16	2	2	0	1	0
z241923	1	45	17	9	0	0	1	0	1	4	1	0	0	0	63	8	2	5+4	1	1	0
z216779	2	24	10	2	2	1	1	0	1	4	1	0	0	0	128	14	3	2	1	0	0
606332	2	17	10	2	1	0	1	1	1	10	0	0	0	0	107	37.9	3	2+5	1	0	0
644401	2	29	10	7	2	0	1	0	1	5	0	0	0	0	108	35	3	2+5	1	0	0
647895	2	51	10	4	1	0	1	0	0	8	0	0	0	0	106	23.2	3	2+5	0	0	0
663870	2	39	9	5	1	0	1	0	0	3	1	0	0	0	136	44.1	3	2+5	0	0	0
668249	2	28	9	6	2	0	1	0	0	5	0	0	0	0	163	38.9	3	2+5	1	0	0
668530	1	59	9	25	1	0	1	1	0	3	0	0	0	0	68	43	3	2+5	0	0	0
671150	1	43	9	9	2	0	1	0	1	10	0	0	0	0	144	37.1	3	2+5	1	0	0
673079	1	52	9	10	2	0	1	0	0	3	0	0	1	0	82	39.8	2	2+5	1	0	0
679918	2	56	9	4	1	0	0	0	0	2	0	0	1	0	138	43.7	3	2+5	0	0	0
682891	2	64	9	3	1	0	1	0	0	1	1	0	0	0	124	40.8	2	2+5	0	0	0
682949	2	45	9	3	2	0	1	0	0	2	0	0	1	0	123	48.3	3	2+5	0	0	0
684162	2	23	9	2	2	0	1	1	0	10	1	0	0	0	118	27	3	2+5	1	0	0
686245	2	47	9	8	2	0	1	0	0	5	1	1	0	0	140	37.8	3	2+5	1	0	0
687239	2	52	9	30	2	1	1	1	1	10	0	0	1	0	75	39.2	3	7+5	0	0	2
687458	1	61	9	3	1	0	0	0	0	2	1	0	0	0	127	38.6	3	2+5	1	1	0
689413	1	23	9	2	0	0	1	0	0	2	0	0	1	0	113	44.2	3	2+5	1	1	0
692820	2	54	9	1	1	0	1	0	1	3	1	0	1	0	115	40	2	2+5	0	1	0
701819	1	27	9	1	1	0	1	1	1	10	0	0	0	0	141	33.5	3	2+5	1	0	0
703190	2	52	9	5	1	0	0	0	1	2	0	0	0	0	120	42.3	3	3+5	0	0	0
704312	1	55	9	1	0	0	0	1	1	5	0	0	0	0	107	45.6	3	2+5	0	0	0
731379	2	45	8	2	2	0	1	0	1	4	0	0	0	0	117	36.3	3	3+5	1	0	0
732622	2	33	8	10	2	0	1	0	1	5	0	0	1	0	69	41.5	3	2+5	1	0	0
736428	2	25	8	4	1	0	1	1	1	8	0	0	0	0	124	36.2	3	2+5	1	0	0
747134	2	52	8	12	1	0	1	0	1	3	0	0	1	0	123	37.5	2	2+5	1	1	0
749896	2	22	8	4	1	0	1	0	1	3	1	0	0	0	101	38.7	3	2+5	1	0	0
760054	2	49	8	4	1	0	1	0	1	2	0	0	0	0	102	37.3	3	2+5	1	0	0
763366	2	22	8	4	1	0	1	0	0	7	0	0	0	0	78	34.7	2	2+5	0	0	0
764689	2	36	8	1	1	0	1	0	1	4	0	0	0	0	122	41.2	2	2+5	1	0	0
765144	2	28	8	8	1	0	1	0	1	10	0	0	1	0	126	42.4	3	2+5	1	0	0
797249	2	30	7	2	1	0	0	0	0	2	0	0	0	1	145	47.5	3	3+5	0	0	0
797742	2	18	7	2	1	0	1	0	0	2	0	0	0	0	102	37.9	3	2+5	1	0	0
798600	1	57	7	3	2	0	1	1	1	8	1	0	0	0	133	39.2	3	2+5	1	1	0
802451	1	27	7	3	1	0	1	0	0	3	0	0	0	0	138	41.5	3	2+5	1	0	0
803748	2	57	7	2	2	0	1	0	0	4	0	0	0	0	91	41.5	2	2+5	0	0	0
812383	1	25	7	2	1	0	1	0	0	3	0	0	0	0	143	43.4	3	2+5	0	0	0
823885	2	52	7	7	1	0	1	0	0	2	1	0	1	0	98	38.3	3	2+5	1	0	0
826645	1	40	7	10	1	0	0	0	1	3	0	0	1	0	114	32	3	2+5	1	0	0
874145	2	29	6	6	0	0	0	0	1	10	0	0	1	0	138	35.4	3	2+5	0	1	0
874260	1	28	6	3	1	0	1	0	1	10	1	0	0	0	98	42.2	3	2+5	1	0	0
950246	2	59	5	10	2	0	1	1	1	10	1	0	1	0	134	40.7	3	2+5	0	0	0
967724	1	30	5	8	1	0	1	1	0	1	0	0	0	0	109	43.5	3	2+4+5	1	0	0
A35439	2	45	4	10	1	0	1	0	1	4	0	0	0	0	82	36	2	3+5	0	0	0
A76692	2	26	4	1.5	1	0	1	0	0	10	0	0	0	0	79	28	3	2+5	1	0	0
A82950	1	35	4	1	1	0	1	0	0	4	0	0	0	0	130	39.9	2	2+5	0	0	0
A87012	2	48	4	15	1	0	1	0	0	10	0	0	0	0	125	37.6	3	2+5	1	0	0
B17917	2	64	4	8	2	0	1	0	1	3	0	0	0	0	132	22.6	3	2+5	1	0	0
B29932	2	37	4	1	1	0	1	0	1	6	1	1	0	0	154	33.2	3	2+5	1	0	0
B54126	1	43	3	10	1	0	1	0	1	10	0	0	0	0	91	42	3	2+5	1	0	0
B64381	2	23	3	3	1	0	1	0	0	3	1	0	0	0	115	29.2	3	2+5	0	0	0
B80527	2	65	3	1	2	1	1	1	1	5	1	0	0	2	125	42.5	3	2+5	0	0	0
B86498	2	35	3	2	2	1	1	1	0	3	0	0	0	0	112	38.1	3	2+5	0	0	0
B96021	2	26	3	1	1	1	0	0	0	2	0	0	0	0	120	43.7	3	2+5	0	0	0
C23566	1	35	3	5	2	1	1	0	1	10	0	0	0	0	115	42.2	3	3+5	1	0	0
C42479	1	26	2	2.5	0	1	1	0	0	4	0	0	0	0	95	38.5	3	2+5	0	0	0
C78557	1	35	2	4	1	1	1	0	0	5	0	0	0	0	82	42.5	3	2+5	1	1	0
C94151	1	33	2	8	2	1	1	1	1	7	0	0	1	1	142	37.5	3	2+5	1	1	0
E45130	2	26	1	5	1	1	1	0	0	6	0	0	0	0	94	40	3	2+5	1	1	0
D13251	1	44	2	10	2	1	1	0	1	6	1	0	0	0	98	27.9	3	2+5	1	1	0
D98717	2	40	1	11	2	1	1	0	1	7	0	1	0	0	103	35.6	3	2+5	0	1	0
650959	2	59	6	1	1	0	1	0	0	1	0	0	0	0	121	41	2	6+5	0	0	0
714537	2	38	6	1	1	1	1	0	1	10	1	0	0	0	79	21.8	3	6+5	1	0	0
665967	1	65	6	1	2	1	1	0	0	10	1	0	0	0	163	27.5	3	2+5	1	0	0
781625	1	56	6	22	2	1	1	1	1	10	0	1	1	0	113	39.1	2	3+5	0	0	0
826583	2	54	7	3	1	1	1	0	1	3	1	0	0	0	102	32.6	3	2+5	1	0	0
834788	2	58	7	7	2	1	1	1	1	10	1	0	1	0	100	35.5	3	7+5	0	0	2
890159	2	41	6	20	2	1	1	1	1	10	1	1	1	0	134	32.2	3	3+5	0	0	0
910318	1	41	6	15	2	1	1	1	1	10	0	1	1	1	93	34.7	3	7+5	1	0	2
962424	1	54	5	6	1	1	1	0	1	5	0	0	1	0	98	38.3	3	3+4+5	0	0	0
A07577	1	69	5	5	2	1	1	0	1	5	0	0	0	0	109	37.9	3	3+5	1	0	0
A84805	1	68	5	4	2	1	1	0	1	7	1	0	1	0	111	29.8	3	2+5	1	0	0
C70530	1	61	4	3	1	1	1	0	0	5	0	0	1	0	128	33.3	3	3+5	1	0	0
E22305	2	42	2	17	2	1	1	0	1	5	0	1	1	1	84	33.9	3	7+5	0	0	2
D79018	2	48	2	18	2	1	0	0	1	6	0	1	1	0	69	26.8	3	7+5	1	0	2
E99137	1	26	1	4.5	2	1	1	0	1	3	0	0	1	0	102	30.2	3	2+5	1	0	0
F16201	2	36	1	10	2	1	1	1	1	10	0	0	0	0	114	35.1	3	3+5	1	0	0
F26503	1	43	1	12	2	1	1	1	1	10	0	0	0	0	89	37.4	3	2+5	1	0	0
689248	1	55	3	10	2	1	1	1	1	10	0	1	0	0	95	35	3	7+5	1	1	2
